# Supplementary material for: Magnetostriction of Amorphous Magnetic Microwires: Role of Local Atomic Environment and Internal Stresses Relaxation
Source: Preprints.org preprint supplement (doi:10.20944/preprints202309.0888.v1), 2023-09-14
Supplement: Supplementary file 1 [file supplementary]

San Sebastián, September 10-th, 2023

Dear Editor,

Please find the revised version of our manuscript “Magnetostriction of Amorphous Magnetic Microwires: Role of Local Atomic Environment and Internal Stresses Relaxation” by Valentina Zhukova, Alfonso García-Gómez, Alvaro Gonzalez, Margarita Churyukanova, Sergei Kaloshkin, Paula Corte-Leon, Mihail Ipatov, Jesus Olivera and Arcady Zhukov (Ref. magnetochemistry-2556434) for its re-consideration for its publication in Magnetochemistry.

We wish thank the referees useful comments. The Referees comments and our answers and modifications are provided below.

Editorial comments:

**Comment:**

Please use the version of your manuscript found at the *above link* for your
revisions.
-The reviewers have checked this manuscript. We found that the main content
is too short. We encourage authors to extend more content in the main text. 
The aim is to make sure that the paper has enough rich content.

Here is the introduction of article types:
<https://www.mdpi.com/about/article_types>

**Response:**

Since the Referees suggest to provide additional data, the revised version is longer than the previous version.

**Comment:**

-During the technical check of your manuscript, we noticed that a high
proportion of the cited references belong to you or your co-authors
Refs.4,5,6,13,15,16,19,20,23,24,26,27,34,35,41,42 which is a self-citation
rate of about 36%. We highly encourage you to include more recent research
results in the manuscript from other researchers in this field to decrease
the self-citation. The reference list should be updated accordingly.

**Response:**

As regarding the comment on self-citations, one of the authors of this manuscript, Dr. A. Zhukov is IEEE Magn. Lett. Editor, Guest Editor of several SI in J. Alloys Compound., J. Magn. Magn. Mater., Physica B, Phys. Stat. Sol A, etc. and member of several Editorial. To our best knowledge, there are no any rules on number of self-citations.

We took some time to check the papers published on the same subject. Below there are the results of just short search of already published papers on the same topic by other authors with citation rate about 50%:

*-* H. Chiriac, T. -A. Óvari, Gh. Pop, J. Magn. Magn. Mater. 157/158 (1996) 227-228 *(citation rate 50%),*

*-* H. Chiriac, T.-A. Óvari, J. Magn. Magn. Mater. (Review) 323 (2011) 2929–2940 *(citation rate 40%),*

*-* T.-A. Óvári, M. Ţibu, and H. Chiriac, *IEEE Trans. Magn. 47, 10 (2011) (citation rate 45%),*

*-* S.A. Baranov, D. Laroze, P. Vargas, M. Vazquez, Physica B 372 (2006) 320–323 *(citation rate 50%),*

*-* H. Chiriac, S. Corodeanu, M. Lostun, G. Stoian, G. Ababei, and T.-A. Ovari, J. Appl. Phys, 109, 063902 (2011) *(citation rate 45%),…*

Therefore, the self-citation rate of the present manuscript (about 34% in the submitted version) is much lower that aforementioned papers. Accordingly, we consider this comment as not appropriate.

The other comment to suggesting to cite “more recent research
results in the manuscript from other researchers in this field” looks strange as well: in our opinion the citations must be focused on references when the related phenomena has been reported for the first time.

However, in the revised version we tried to reduce the number of self-citations: we extended the introduction and included several references in the introduction section from the other groups.

**Comment:**

-Since the reviewer suggested English language editing in review report,
please ask a native speaker or a professional English-editing company to
polish the language thoroughly before your re-submission.

**Response:**

Most of the Referees said that the English is fine. There are a couple of suggestions to rewrite the equations and substitute comma by dot …. One of the referee suggested to pay attention on articles. Accordingly, we have revised the manuscript and corrected the typos and other mentioned issues.

On the other, the corresponding author has published more than 600 peer-reviewed papers (mostly in Q1) journal being IEEE Magn. Letter Editor. Therefore, we feel that we do nott need to ask a native speaker or a professional English-editing company topolish the language.

**Comment:**

-As the last referee has not finalized his/her review, we are now sending the
available comments to you for revision to save more time. Once we receive the
last report, we will send it to you immediately. We will also keep you
informed if we decide to cancel the review request.

**Comment:**

In fact, all 4 reports have been provided. In the revised version we have already addressed the comments of the Referee. 4.

We also noticed that all the Referee suggested only minor revisions.

We appreciate all the useful comments. We hope that the revised manuscript is in suitable form for publication in **Magnetochemistry**.

Sincerely yours,

Dr. A. Zhukov

E-mail: [arkadi.joukov@ehu.es](mailto:arkadi.joukov@ehu.es)

Tel: 34-943-018611

Fax: 34-943-017130
